# Supplementary material
Source: PubMed Central journal article supplement (PMC3014367)
Supplement: mmc1.pdf [file mmc1.pdf]

The American Journal of Human Genetics, Volume 88

## Supplemental Data

### ***NEK1* Mutations Cause**

### **Short Rib-Polydactyly Syndrome Type Majewski**

Christian Thiel, Kristin Kessler, Andreas Giessl, Arno Dimmler, Stavit A. Shalev, Sigrun von der Haar, Martin Zenker, Diana Zahnleiter, Hartmut Stöss, Ernst Beinder, Rami Abou Jamra, Arif B. Ekici, Nadja Schröder-Kreß, Thomas Aigner, Thomas Kirchner, André Reis, Johann H. Brandstätter, and Anita Rauch

a

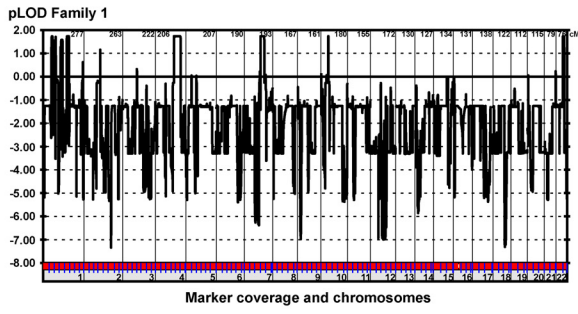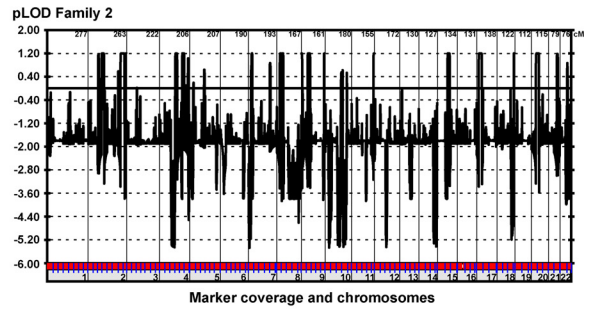

b

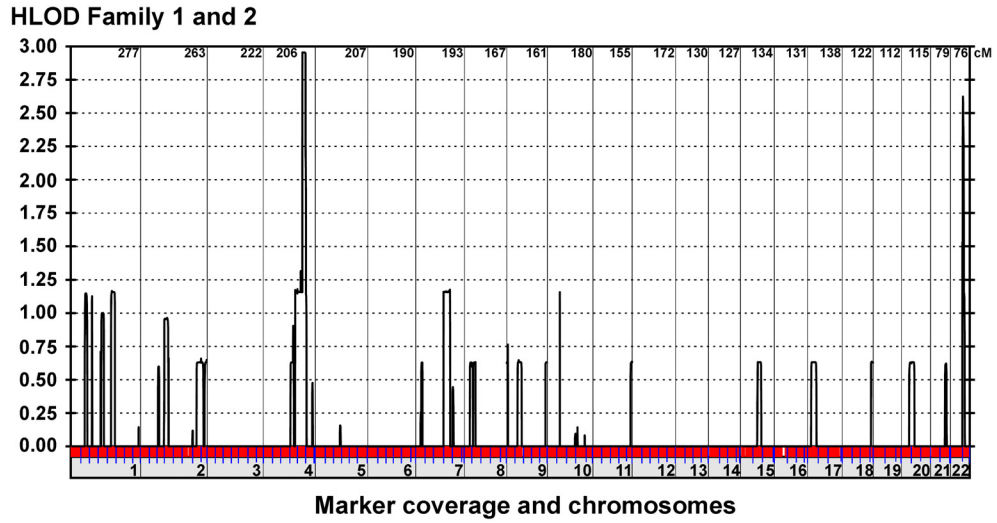

c

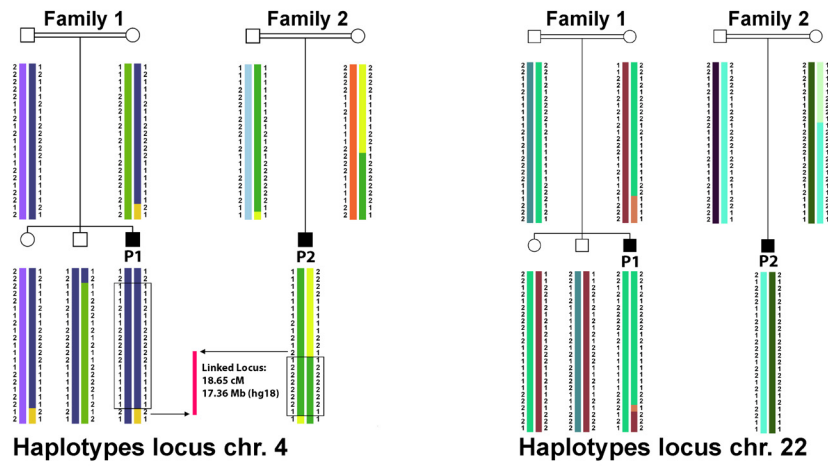

d

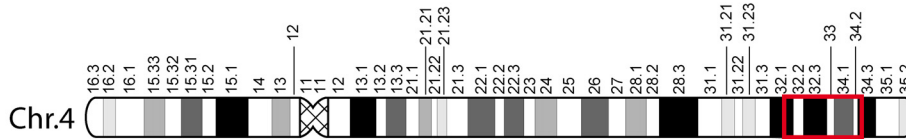

e

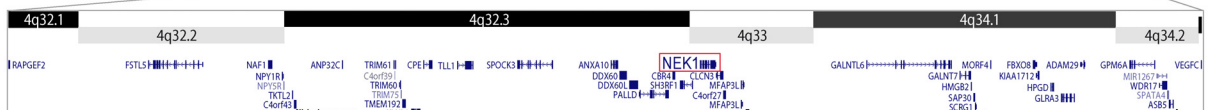

**Figure S1. Positional Cloning of *NEK1***

(A) Individual parametric multipoint LOD scores for the two consanguineous families 1 and 2. (B) SRPS Majewski type homozygosity mapping detected a linked locus on 4q32.1–34.3 with a HLOD of 2.95 and a second possible locus on chr. 22. (C) Haplotype structure analysis in the two consanguineous families confirmed and refined the locus to 18.65 cM / 17.36 Mb (D, E) including 54 RefSeq and hypothetical genes on chr. 4.

**a**

Family 1

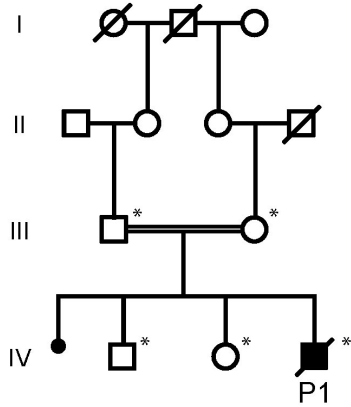

Family 2

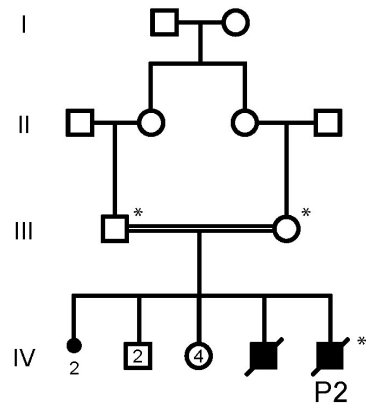

Family 3

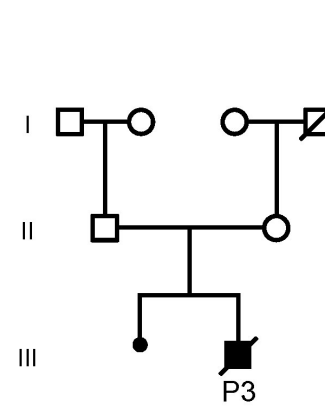**b**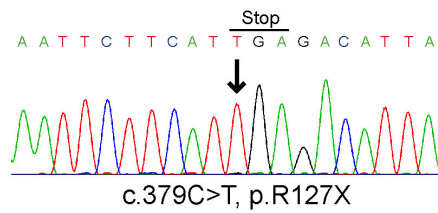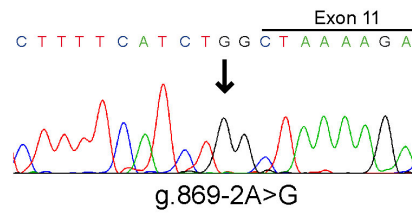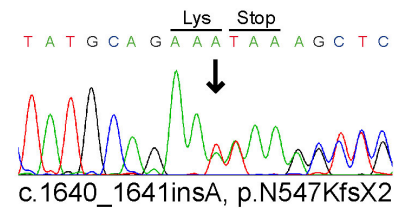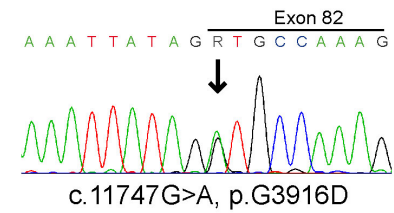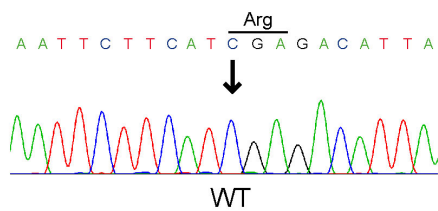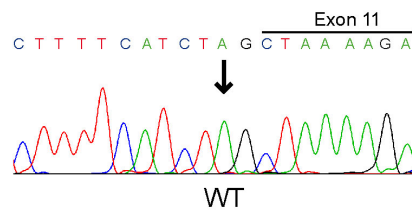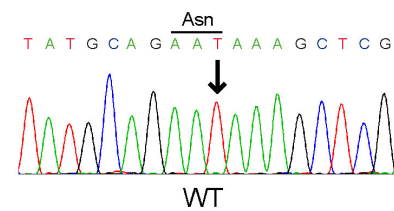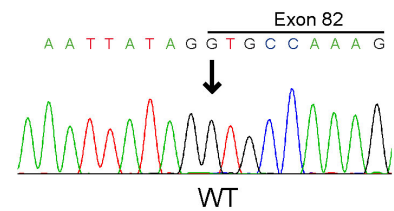

NEK1 exon 5

NEK1 intron 10

NEK1 exon 18

DYNC2H1

**Figure S2. Pedigrees of Investigated Families and the Respective Mutations in the *NEK1* and *DYNC2H1* Genes**

(A) Families 1 and 2 were used for the whole-genome scan. Individuals marked with asterisks were included in the linkage analysis. (B) The individuals of the consanguineous families 1 and 2 were homozygous for a nonsense and a splice/site mutation, respectively. The affected individual of family 3 showed a heterozygous mutation of the *NEK1* and the *DYNC2H1* genes.

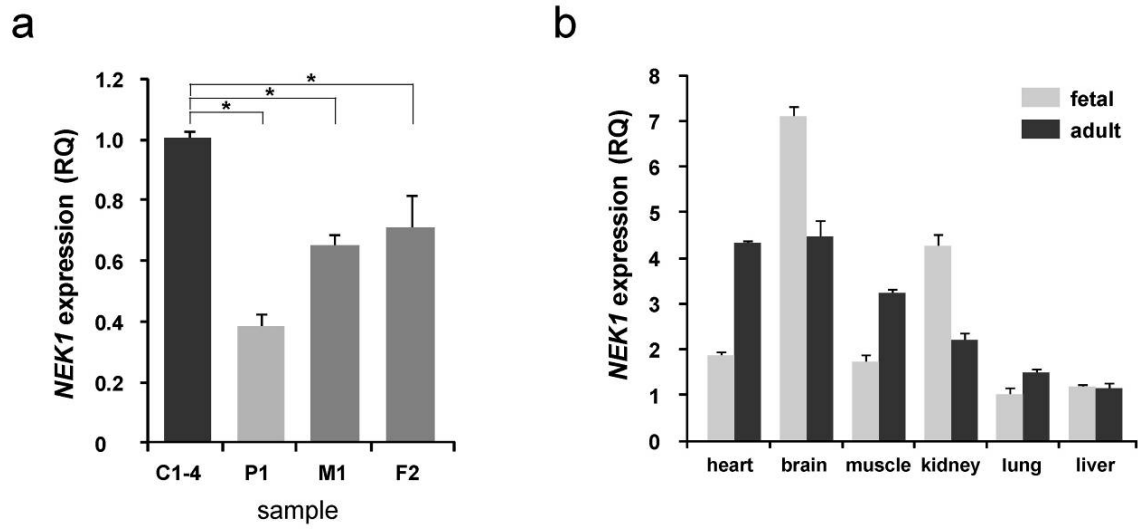

**Figure S3. *NEK1* Gene Expression**

(A) Relative mRNA expression levels of the *NEK1* gene in lymphoblastoid cell lines of the patient (P1), the mother (M1), the father (F2) of family 1 and 4 healthy controls (C1-4). Note significant decrease of *NEK1* expression levels in the patient and the parents (\*t test  $p < 0.001$ ). (B) Relative expression levels of *NEK1* in different human fetal and adult tissues. Note the highest fetal expression levels in the brain and kidney, and the highest adult levels in brain, heart and muscle.

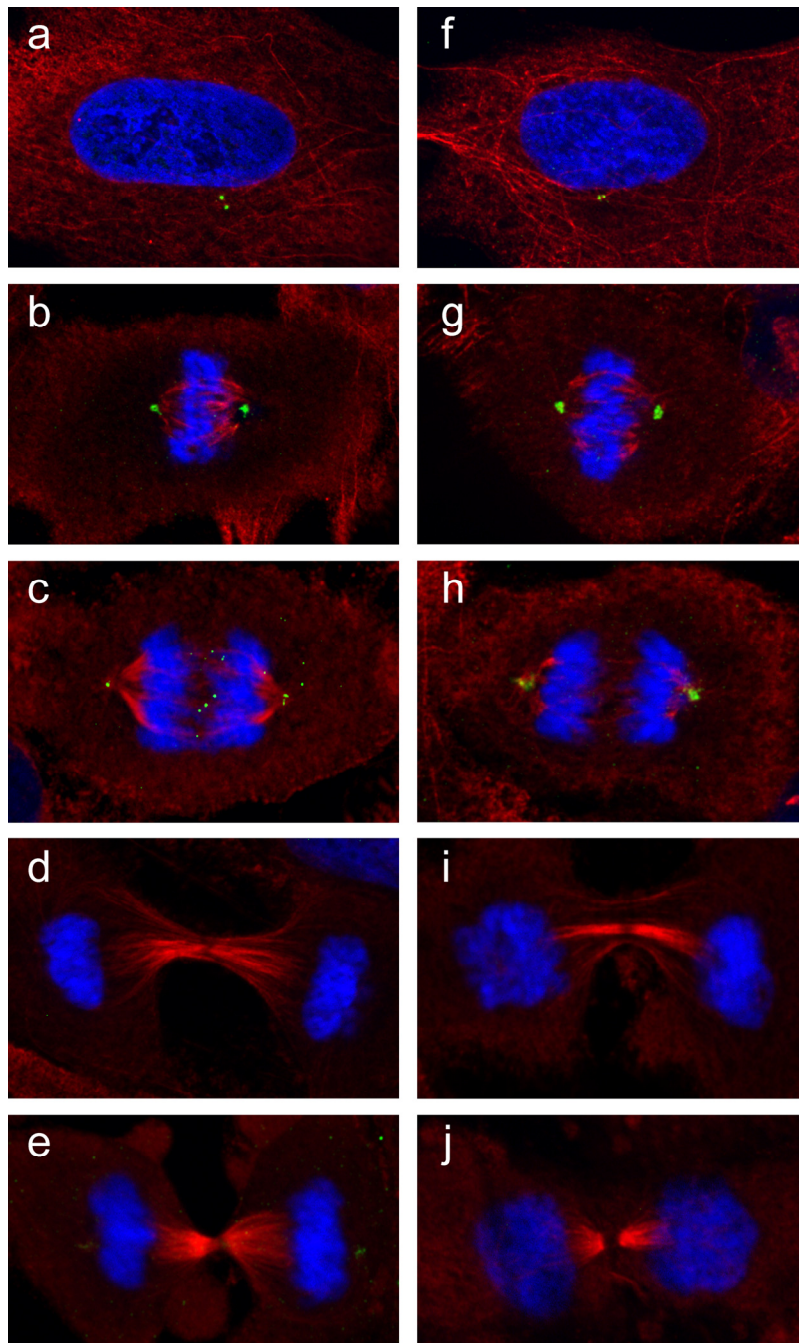

**Figure S4. Mitotic Morphology of Patient Fibroblasts**

Immunofluorescence images of fibroblast cells with antibodies against Pericentrin (PCNT, green) and  $\alpha$ -tubulin (red), and 4',6'-diamino-2-phenylindole (DAPI) staining of chromosomes (blue). (A-E) Morphology of fibroblasts from a healthy control individual during (A) interphase, (B) metaphase, (C) anaphase, (D) telophase, and (E) cytokinesis. (F-J) Cell cycle morphology of the affected individual P1 [(F) interphase, (G) metaphase, (H) anaphase, (I) telophase, (J) cytokinesis]. Note the same cell cycle morphology of both samples.

**Table S1. Main Characteristics of Human Ciliopathies**

|                                         | Alstrom syndrome <sup>1</sup> | Bardet-Biedl syndrome <sup>2</sup> | Joubert syndrome <sup>3</sup>        | Meckel-Gruber syndrome <sup>4</sup> | Nephro-nophthisis <sup>5</sup> | Oral-facial-digital syndrome <sup>6</sup> | Primary Ciliary Dyskinesia <sup>7</sup>                         | Polycystic kidney disease <sup>8</sup> | Retinitis pigmentosa <sup>9</sup> | Senior-Loken syndrome <sup>10</sup> |
|-----------------------------------------|-------------------------------|------------------------------------|--------------------------------------|-------------------------------------|--------------------------------|-------------------------------------------|-----------------------------------------------------------------|----------------------------------------|-----------------------------------|-------------------------------------|
| Inheritance                             | autosomal recessive           | autosomal recessive                | autosomal recessive                  | autosomal recessive                 | autosomal recessive            | X-linked dominant                         | autosomal recessive                                             | autosomal recessive / dominant         | autosomal / X-linked recessive    | autosomal recessive                 |
| Genes                                   | ALMS1                         | BBS1-14                            | AHI1, NPHP1, NPHP6, TMEM67, RPGRIP1L | MKS1, 3-6                           | NPHP1-9                        | OFD1                                      | DNAI1, DNAH5, DNAH11, DNAI2, TXNDC3, RSPH9, RSPH4A, KTU, LRRC50 | PKD1, PKD2, PKHD1                      | RP1, RPGR                         | NPHP1, 4 - 6                        |
| Brain malformation                      |                               |                                    | +                                    | +                                   |                                | +                                         |                                                                 |                                        |                                   |                                     |
| Polydactyly                             |                               | +                                  | +                                    | +                                   |                                | +                                         |                                                                 |                                        |                                   |                                     |
| Kidney disease                          | +                             | +                                  | +                                    | +                                   | +                              | +                                         |                                                                 | +                                      |                                   | +                                   |
| Retinal degeneration                    | +                             | +                                  | +                                    |                                     | +                              |                                           |                                                                 |                                        | +                                 | +                                   |
| Skeletal abnormalities                  | +                             | +                                  |                                      | +                                   |                                | +                                         |                                                                 |                                        |                                   |                                     |
| Developmental delay                     | +                             | +                                  | +                                    |                                     |                                | +                                         |                                                                 |                                        |                                   |                                     |
| Cardiac anomalies                       | +                             | +                                  | +                                    | +                                   |                                |                                           |                                                                 |                                        |                                   |                                     |
| Hepatic abnormalities                   | +                             | +                                  | +                                    | +                                   | +                              |                                           |                                                                 | +                                      |                                   |                                     |
| Short stature                           | +                             |                                    |                                      |                                     | +                              | (+)                                       |                                                                 |                                        |                                   |                                     |
| Obesity                                 | +                             | +                                  | +                                    |                                     |                                |                                           |                                                                 |                                        |                                   |                                     |
| Hearing impairment                      | +                             | +                                  |                                      |                                     |                                |                                           | +                                                               |                                        |                                   |                                     |
| Deafness                                | +                             |                                    |                                      |                                     |                                |                                           |                                                                 |                                        |                                   |                                     |
| Diabetes mellitus / Insulin resistance  | +                             | +                                  |                                      |                                     |                                |                                           |                                                                 |                                        |                                   |                                     |
| Male infertility/ Hypogonadism          | +                             | +                                  |                                      |                                     |                                |                                           | +                                                               |                                        |                                   |                                     |
| Situs inversus                          |                               | +                                  |                                      |                                     |                                |                                           | +                                                               |                                        |                                   |                                     |
| Pulmonary disease / recurrent infection |                               |                                    |                                      |                                     |                                |                                           | +                                                               | (+)                                    |                                   |                                     |
| Vascular abnormalities                  |                               |                                    |                                      |                                     |                                |                                           |                                                                 | +                                      |                                   |                                     |



**Table S2A. SRPSs Classification and Macroscopic Findings**

| SRPS Classification              | Majewski           | Non-Majewski   |                                |              |                      |           |           | Ellis v. Crefeld           |
|----------------------------------|--------------------|----------------|--------------------------------|--------------|----------------------|-----------|-----------|----------------------------|
|                                  |                    | Saldino-Noonan | Verma-Naumhoff                 | Jeune        | Beemer               | Le Marec  | Yang      |                            |
| Sillence <sup>11</sup>           | Type II            | Type I         | Type III                       |              | Type IV              |           |           |                            |
| Spranger-Maroteaux <sup>12</sup> | Type VI            | Type I         | Type II                        | Type V       | Type VII             | Type III  | Type IV   |                            |
| Known Genes                      |                    |                | <i>DYNC2H1</i><br><i>IFT80</i> | <i>IFT80</i> |                      |           |           | <i>EVC1</i><br><i>EVC2</i> |
| Hydrops                          | +                  | +              | +                              |              | +                    |           |           |                            |
| Short stature                    | +                  | +              | +                              | +            | +                    | +         | +         | +                          |
| Narrow Thorax                    | +                  | +              | +                              | +            | +                    | +         | +         | (+)                        |
| Polydaktyly                      | pre- and postaxial | postaxial      | (postaxial)                    | (postaxial)  | (pre- and postaxial) | postaxial | postaxial | postaxial                  |
| Depressed Nasal bridge           |                    | +              | +                              |              |                      |           |           |                            |
| Median Cleft Palate              | +                  |                |                                |              | +                    |           |           |                            |
| Additional Facial features       |                    | + <sup>a</sup> |                                |              | + <sup>b</sup>       |           |           |                            |
| Hypoplastic Lungs                | +                  | +              | +                              |              | +                    |           | +         |                            |
| Cardiac abnormalities            | (+)                | (+)            | (+)                            | (+)          | (+)                  | (+)       | +         | +                          |
| Genito-uretral abnormalities     | (+)                | +              | +                              | (+)          | (+)                  | (+)       | (+)       | (+)                        |
| Cerebral abnormalities           | (+)                | (+)            | +                              |              | + <sup>c</sup>       | +         |           |                            |

**Note.** <sup>a</sup> Retrognathia, <sup>b</sup> Prominent forehead, flat face, hypertelorism, <sup>c</sup> Holoprosencephaly, Anencephaly

**Table S2B. SRPSs Radiographic Characteristics**

| SRPS Classification                                         | Majewski | Non-Majewski   |                |       |        |          |      | Ellis v. Crefeld |
|-------------------------------------------------------------|----------|----------------|----------------|-------|--------|----------|------|------------------|
|                                                             |          | Saldino-Noonan | Verma-Naumhoff | Jeune | Beemer | Le Marec | Yang |                  |
| Rib anomaly                                                 | +        | +              | +              | +     | +      | +        | +    | +                |
| Platyspondyly                                               |          | +              | +              |       |        | +        |      |                  |
| Pelvis                                                      |          |                |                |       |        |          |      |                  |
| small                                                       |          |                |                | +     |        | +        | +    |                  |
| small iliac bones only                                      |          | +              | +              |       | +      |          |      |                  |
| flattened acetabular roof                                   |          | +              | +              |       |        |          |      |                  |
| Limbs                                                       |          |                |                |       |        |          |      |                  |
| Short tubular bones                                         | +        |                |                |       |        |          |      |                  |
| “torpede shaped” bones                                      |          | +              | +              |       |        |          |      | +                |
| Incomplete ossification                                     |          | +              | +              |       |        |          |      |                  |
| “banana-peel” metaphysis                                    |          |                | +              | +     |        | +        | +    |                  |
| Bowed radius / ulna                                         |          |                |                |       | +      | +        | +    |                  |
| Shortening of the tibia                                     | +        | (+)            |                |       |        |          |      | +                |
| Incomplete ossification of the metacarpal/ metatarsal bones |          | +              | +              |       |        |          |      | a                |
| Further anomalies                                           |          |                |                |       |        |          |      | b                |

Note. <sup>a</sup> Additional carpal bone, fusion of os capitatum and hamatum, <sup>b</sup> Hypoplastic nails

**Table S3. Results of Candidate Gene Prioritization (ENDEAVOUR Software)**

| Gene symbol | Global prioritization |        | Annotation EnsemblEst |          | Annotation GeneOntology |          | Annotation Interpro |       | Annotation Kegg |       | Annotation Swissprot |          | Blast |            | CisRegModule |        | Expression SonEtAl |       | Expression SuEtAl |       | Interaction Bind |       | Interaction BioGrid |       | Interaction Hprd |       | Interaction InNetDb |       | Interaction Intact |       | Interaction Mint |       | Interaction String |       | Motif |       | Precalc. Ouzounis |       | Precalc. Prospectr |       | Text |       |    |      |
|-------------|-----------------------|--------|-----------------------|----------|-------------------------|----------|---------------------|-------|-----------------|-------|----------------------|----------|-------|------------|--------------|--------|--------------------|-------|-------------------|-------|------------------|-------|---------------------|-------|------------------|-------|---------------------|-------|--------------------|-------|------------------|-------|--------------------|-------|-------|-------|-------------------|-------|--------------------|-------|------|-------|----|------|
|             | score                 | rank   | rank                  | score    | rank                    | score    | rank                | score | rank            | score | rank                 | score    | rank  | score      | rank         | score  | rank               | score | rank              | score | rank             | score | rank                | score | rank             | score | rank                | score | rank               | score | rank             | score | rank               | score | rank  | score | rank              | score | rank               | score |      |       |    |      |
| HMGB2       | 1                     | 0.0166 | 9                     | 1.14E-25 | 3                       | 1.39E-35 | 4                   | 1     | 12              | none  | 5                    | 0.0276   | 11    | 86.7       | 23           | none   | 18                 | 0.798 | 4                 | 0.646 | 1                | 1.5   | 2                   | 13    | 6                | 13    | 8                   | 4.65  | 1                  | 1.5   | 2                | none  | 7                  | 1.9   | 7     | 0.946 | 12                | 0.454 | 19                 | 0.52  | 11   | 0.571 |    |      |
| NEK1        | 2                     | 0.0397 | 4                     | 1.76E-26 | 13                      | 6.63E-14 | 12                  | 1     | 17              | none  | 3                    | 0.00326  | 2     | 2.00E-11   | 12           | none   | 4                  | 0.622 | 13                | 0.768 | 3                | 5     | 4                   | none  | 5                | 4.67  | 2                   | 1.75  | 3                  | 6     | 3                | none  | 9                  | 1.94  | 14    | 0.967 | 21                | 0.71  | 22                 | 0.59  | 5    | 0.407 |    |      |
| SC4MOL      | 3                     | 0.0602 | 7                     | 7.03E-26 | 12                      | 2.22E-14 | 11                  | 1     | 3               | 1     | 12                   | 1        | 23    | 666        | 2            | 0.0482 | 13                 | 0.734 | 15                | 0.8   | 15               | none  | 16                  | none  | 2                | 2     | 9                   | 5.88  | 2                  | 2     | 1                | 2     | 16                 | 3.2   | 2     | 0.842 | 8                 | 0.375 | 13                 | 0.475 | 22   | 0.734 |    |      |
| CPE         | 4                     | 0.062  | 5                     | 6.45E-26 | 20                      | 0.00122  | 19                  | 1     | 5               | 1     | 14                   | 1        | 8     | 22.4       | 8            | 0.0891 | 14                 | 0.735 | 8                 | 0.72  | 9                | none  | 10                  | none  | 7                | 18    | 5                   | 3.04  | 4                  | 10    | 4                | none  | 8                  | 1.92  | 16    | 0.97  | 7                 | 0.352 | 12                 | 0.474 | 15   | 0.648 |    |      |
| CLCN3       | 5                     | 0.0912 | 6                     | 7.03E-26 | 4                       | 8.75E-23 | 5                   | 1     | 13              | none  | 6                    | 0.0276   | 27    | 982        | 6            | 0.059  | 3                  | 0.609 | 10                | 0.741 | 11               | none  | 12                  | none  | 14               | none  | 7                   | 3.39  | 9                  | none  | 9                | none  | 13                 | 2.06  | 4     | 0.939 | 1                 | 0.217 | 6                  | 0.402 | 19   | 0.704 |    |      |
| TLL1        | 6                     | 0.114  | 16                    | 9.85E-23 | 28                      | 0.347    | 27                  | 1     | 27              | none  | 9                    | 0.0276   | 5     | 0.00001    | 9            | 0.131  | 23                 | none  | 26                | none  | 26               | none  | 26                  | none  | 26               | none  | 14                  | 24    | 14                 | none  | 14               | none  | 6                  | 1.56  | 6     | 0.944 | 4                 | 0.324 | 1                  | 0.225 | 13   | 0.631 |    |      |
| PALLD       | 7                     | 0.147  | 1                     | 1.22E-27 | 1                       | 3.22E-67 | 2                   | 1     | 10              | none  | 27                   | none     | 22    | 665        | 28           | none   | 11                 | 0.726 | 23                | none  | 23               | none  | 23                  | none  | 24               | none  | 25                  | none  | 25                 | none  | 25               | none  | 12                 | 2     | 22    | 0.979 | 16                | 0.588 | 18                 | 0.5   | 8    | 0.499 |    |      |
| KLHL2       | 8                     | 0.164  | 13                    | 3.91E-25 | 2                       | 2.01E-40 | 3                   | 1     | 11              | none  | 10                   | 0.0635   | 25    | 700        | 1            | 0.0395 | 7                  | 0.704 | 21                | none  | 21               | none  | 21                  | none  | 22               | none  | 1                   | 1.69  | 5                  | none  | 5                | none  | 5                  | 1.48  | 25    | 0.983 | 20                | 0.703 | 5                  | 0.393 | 16   | 0.672 |    |      |
| C4orf27     | 9                     | 0.195  | 17                    | 1.23E-22 | 9                       | 1.83E-16 | 28                  | none  | 28              | none  | 26                   | 1        | 16    | 335        | 27           | none   | 5                  | 0.633 | 1                 | 0.596 | 2                | 2     | 3                   | none  | 1                | 2     | 15                  | none  | 15                 | none  | 15               | none  | 23                 | none  | 23    | 0.98  | 11                | 0.45  | 16                 | 0.477 | 7    | 0.494 |    |      |
| TKTL2       | 10                    | 0.217  | 11                    | 3.54E-25 | 14                      | 1.19E-10 | 13                  | 1     | 4               | 1     | 13                   | 1        | 21    | 529        | 16           | none   | 25                 | none  | 27                | none  | 27               | none  | 27                  | none  | 27               | none  | 27                  | none  | 27                 | none  | 27               | none  | 15                 | 2.4   | 18    | 0.975 | 6                 | 0.333 | 10                 | 0.447 | 1    | 0.307 |    |      |
| GK3P        | 11                    | 0.227  | 18                    | 1.37E-21 | 6                       | 5.94E-21 | 6                   | 1     | 14              | none  | 4                    | 0.00378  | 10    | 57.1       | 22           | none   | 27                 | none  | 12                | 0.756 | 13               | none  | 14                  | none  | 16               | none  | 21                  | none  | 21                 | none  | 21               | none  | 20                 | 8.5   | 19    | 0.976 | 14                | 0.483 | 11                 | 0.457 | 28   | none  |    |      |
| SH3RF1      | 12                    | 0.25   | 15                    | 4.17E-25 | 15                      | 3.82E-08 | 14                  | 1     | 18              | none  | 20                   | 1        | 4     | 0.00000141 | 5            | 0.0561 | 16                 | 0.749 | 24                | none  | 24               | none  | 24                  | none  | 3                | 2.67  | 16                  | none  | 16                 | none  | 16               | none  | 24                 | none  | 12    | 0.965 | 15                | 0.583 | 4                  | 0.392 | 6    | 0.474 |    |      |
| GALNT7      | 13                    | 0.282  | 8                     | 1.14E-25 | 21                      | 0.00122  | 20                  | 1     | 6               | 1     | 15                   | 1        | 17    | 381        | 10           | 0.168  | 20                 | 0.849 | 2                 | 0.601 | 4                | none  | 5                   | none  | 9                | none  | 3                   | 2.05  | 6                  | none  | 6                | none  | 17                 | 3.33  | 1     | 0.821 | 17                | 0.592 | 7                  | 0.418 | 23   | 0.75  |    |      |
| SAP30       | 14                    | 0.298  | 3                     | 1.46E-26 | 5                       | 3.31E-21 | 1                   | 0.564 | 9               | none  | 18                   | 1        | 28    | none       | 3            | 0.0507 | 2                  | 0.579 | 3                 | 0.619 | 5                | none  | 6                   | none  | 8                | 19.5  | 11                  | 8.33  | 11                 | none  | 11               | none  | 14                 | 2.3   | 21    | 0.979 | 9                 | 0.399 | 27                 | 0.686 | 21   | 0.726 |    |      |
| CBR4        | 15                    | 0.348  | 14                    | 4.17E-25 | 26                      | 0.084    | 25                  | 1     | 25              | none  | 25                   | 1        | 19    | 496        | 15           | none   | 15                 | 0.737 | 5                 | 0.654 | 6                | none  | 7                   | none  | 10               | none  | 10                  | 7     | 10                 | none  | 10               | none  | 19                 | 6.6   | 5     | 0.94  | 10                | 0.449 | 9                  | 0.443 | 3    | 0.337 |    |      |
| TRIM75      | 16                    | 0.362  | 28                    | none     | 18                      | 2.85E-07 | 17                  | 1     | 21              | none  | 28                   | none     | 1     | 1.41E-11   | 18           | none   | 26                 | none  | 28                | none  | 28               | none  | 28                  | none  | 28               | none  | 28                  | none  | 28                 | none  | 28               | none  | 28                 | none  | 20    | 0.978 | 28                | none  | 2                  | 0.361 | 27   | none  |    |      |
| GK          | 17                    | 0.377  | 26                    | none     | 7                       | 5.94E-21 | 7                   | 1     | 1               | 1     | 1                    | 5.08E-09 | 9     | 57.1       | 13           | none   | 12                 | 0.727 | 11                | 0.754 | 12               | none  | 13                  | none  | 15               | none  | 4                   | 2.57  | 7                  | none  | 7                | none  | 22                 | none  | 3     | 0.854 | 25                | none  | 21                 | 0.567 | 24   | 0.756 |    |      |
| SPOCK3      | 18                    | 0.386  | 20                    | 1.02E-20 | 25                      | 0.0118   | 24                  | 1     | 24              | none  | 24                   | 1        | 12    | 156        | 7            | 0.0726 | 6                  | 0.647 | 14                | 0.769 | 14               | none  | 15                  | none  | 17               | none  | 6                   | 3.25  | 8                  | none  | 8                | none  | 10                 | 2     | 17    | 0.973 | 27                | none  | 8                  | 0.427 | 9    | 0.547 |    |      |
| HAND2       | 19                    | 0.448  | 19                    | 1.73E-21 | 8                       | 3.70E-19 | 8                   | 1     | 15              | none  | 19                   | 1        | 20    | 528        | 4            | 0.0517 | 17                 | 0.778 | 19                | 0.902 | 19               | none  | 1                   | 6     | 4                | 4.67  | 17                  | none  | 17                 | none  | 17               | none  | 3                  | 1.42  | 10    | 0.951 | 3                 | 0.262 | 25                 | 0.617 | 18   | 0.695 |    |      |
| MFAP3L      | 20                    | 0.512  | 2                     | 3.61E-27 | 19                      | 0.000292 | 18                  | 1     | 22              | none  | 22                   | 1        | 26    | 727        | 11           | 0.195  | 10                 | 0.726 | 7                 | 0.702 | 8                | none  | 9                   | none  | 12               | none  | 19                  | none  | 19                 | none  | 19               | none  | 25                 | none  | 13    | 0.966 | 26                | none  | 15                 | 0.475 | 10   | 0.558 |    |      |
| AADAT       | 21                    | 0.533  | 10                    | 1.59E-25 | 10                      | 1.54E-15 | 9                   | 1     | 2               | 1     | 11                   | 1        | 7     | 8.83       | 21           | none   | 22                 | 0.917 | 25                | none  | 25               | none  | 25                  | none  | 25               | none  | 26                  | none  | 26                 | none  | 26               | none  | 18                 | 3.38  | 24    | 0.98  | 13                | 0.463 | 14                 | 0.475 | 2    | 0.33  |    |      |
| TRIM60      | 22                    | 0.6    | 25                    | 0.00672  | 17                      | 2.85E-07 | 16                  | 1     | 20              | none  | 2                    | 1.56E-07 | 3     | 3.87E-07   | 19           | none   | 1                  | 0.486 | 20                | none  | 20               | none  | 20                  | none  | 21               | none  | 23                  | none  | 23                 | none  | 23               | none  | 26                 | none  | 8     | 0.95  | 24                | 0.762 | 23                 | 0.59  | 4    | 0.379 |    |      |
| ANXA10      | 23                    | 0.603  | 23                    | 1.49E-12 | 11                      | 3.54E-15 | 10                  | 1     | 16              | none  | 7                    | 0.0276   | 13    | 231        | 24           | none   | 19                 | 0.838 | 18                | 0.887 | 18               | none  | 19                  | none  | 20               | none  | 12                  | 10    | 12                 | none  | 12               | none  | 1                  | 1.25  | 9     | 0.95  | 23                | 0.745 | 17                 | 0.482 | 17   | 0.673 |    |      |
| NPY1R       | 24                    | 0.741  | 21                    | 7.65E-19 | 24                      | 0.00173  | 23                  | 1     | 8               | 1     | 17                   | 1        | 24    | 699        | 17           | none   | 21                 | 0.854 | 17                | 0.844 | 17               | none  | 18                  | none  | 19               | none  | 13                  | 24    | 13                 | none  | 13               | none  | 2                  | 1.36  | 27    | 0.991 | 2                 | 0.243 | 3                  | 0.392 | 12   | 0.617 |    |      |
| MARCH1      | 25                    | 0.744  | 12                    | 3.55E-25 | 22                      | 0.00122  | 21                  | 1     | 23              | none  | 23                   | 1        | 14    | 264        | 25           | none   | 9                  | 0.726 | 9                 | 0.721 | 10               | none  | 11                  | none  | 13               | none  | 20                  | none  | 20                 | none  | 20               | none  | 11                 | 2     | 11    | 0.963 | 19                | 0.615 | 24                 | 0.615 | 26   | 0.875 |    |      |
| TRIM61      | 26                    | 0.871  | 22                    | 1.06E-14 | 16                      | 2.85E-07 | 15                  | 1     | 19              | none  | 21                   | 1        | 6     | 0.008      | 20           | none   | 8                  | 0.715 | 22                | none  | 22               | none  | 22                  | none  | 23               | none  | 24                  | none  | 24                 | none  | 24               | none  | 24                 | none  | 27    | none  | 15                | 0.968 | 22                 | 0.725 | 26   | 0.643 | 20 | 0.72 |
| NPYSR       | 27                    | 0.883  | 24                    | 6.95E-10 | 23                      | 0.00135  | 22                  | 1     | 7               | 1     | 16                   | 1        | 18    | 451        | 14           | none   | 24                 | none  | 6                 | 0.699 | 7                | none  | 8                   | none  | 11               | none  | 18                  | none  | 18                 | none  | 18               | none  | 4                  | 1.45  | 28    | 0.992 | 5                 | 0.329 | 20                 | 0.566 | 14   | 0.636 |    |      |
| ANP32C      | 28                    | 0.994  | 27                    | none     | 27                      | 0.181    | 26                  | 1     | 26              | none  | 8                    | 0.0276   | 15    | 293        | 26           | none   | 28                 | none  | 16                | 0.817 | 16               | none  | 17                  | none  | 18               | none  | 22                  | none  | 22                 | none  | 22               | none  | 21                 | 10.3  | 26    | 0.983 | 18                | 0.595 | 28                 | 0.909 | 25   | 0.777 |    |      |

Note. Red box indicating the *NEK1* gene.

**Table S4A. *In silico* Splice Site Prediction Analysis of Identified Variants**

| Gene           | Nucleotide change | Amino acid change | Position | HSF 2.4     |             | Splice-View |                | NetGene2   |                | BDGP       |                |
|----------------|-------------------|-------------------|----------|-------------|-------------|-------------|----------------|------------|----------------|------------|----------------|
|                |                   |                   |          | wild-type   | mutated     | wild-type   | mutated        | wild-type  | mutated        | wild-type  | mutated        |
| <i>NEK1</i>    | c.869-2A>G        | none              | acceptor | score 82.88 | score 53.93 | score 84    | <b>no site</b> | score 0.62 | <b>no site</b> | score 0.98 | <b>no site</b> |
|                | c.2680+5G>A       | none              | donor    | score 90.24 | score 78.08 | score 84    | score 77       | score 0.63 | <b>no site</b> | score 0.99 | score 0.50     |
| <i>DYNC2H1</i> | c.11747G>A        | p.Gly3916Asp      | acceptor | n.d.        | n.d.        | score 79    | score 77       | score 0.25 | score 0.19     | score 0.87 | score 0.75     |

**Note.** Donor and acceptor splice site prediction for nucleotide changes in *NEK1* and *DYNC2H1* were calculated using the programs HSF 2.4, Splice-View, NetGene2, and Berkeley Drosophila Genome Project (BDGP). High and low scores indicate strong and weak recognition splice sites, respectively. Loss of splice site is denoted by “no site”.

**Table S4B. In silico Protein Analysis of Amino Acid Substitutions**

| Gene           | Nucleotide change | Amino acid change | SIFT  |            | PolyPhen |            | Panther         |                |
|----------------|-------------------|-------------------|-------|------------|----------|------------|-----------------|----------------|
|                |                   |                   | score | prediction | score    | prediction | score           | prediction     |
| <i>NEK1</i>    | c.379C>T          | p.Arg127X         | N/A   | N/A        | N/A      | N/A        | N/A             | N/A            |
|                | C.1640dup         | p.Asn547LysfsX2   | N/A   | N/A        | N/A      | N/A        | N/A             | N/A            |
| <i>DYNC2H1</i> | c.11747G>A        | p.Gly3916Asp      | 0.72  | tolerated  | 0.227    | benign     | <b>-4.06593</b> | <b>0.74382</b> |

**Note.** Amino acid substitutions were analyzed by the SIFT, PolyPhen, and PANTHER programs. When the program offered a choice of parameter settings, defaults were used. Tolerated and benign indicate that the amino acid substitution is unlikely to affect protein function. Panther: A cutoff of -3 corresponds to a 50% probability that a score is deleterious.

**Table S4C. Open Reading Frame of Nonsense Mutations**

| Gene        | Nucleotide change | Amino acid change | mRNA    | Protein | Domains                                                  |
|-------------|-------------------|-------------------|---------|---------|----------------------------------------------------------|
| <i>NEK1</i> | wild type         | wild type         | 3777 bp | 1258 aa | Kinase, basic, Coiled-coil, nuclear export sequence 1 &2 |
|             | c.379C>T          | p.Arg127X         | 381 bp  | 126 aa  | N-terminal part of kinase domain                         |
|             | C.1640dup         | p.Asn547LysfsX2   | 1644 bp | 547 aa  | Kinase, basic, n-terminal part of coiled-coil            |

### Supplemental References

1. Marshall, J.D., Bronson, R.T., Collin, G.B., Nordstrom, A.D., Maffei, P., Paisey, R.B., Carey, C., Macdermott, S., Russell-Eggitt, I., Shea, S.E., et al. (2005). New Alstrom syndrome phenotypes based on the evaluation of 182 cases. *Arch Intern Med* 165, 675-683.
2. Beales, P.L., Elcioglu, N., Woolf, A.S., Parker, D., and Flinter, F.A. (1999). New criteria for improved diagnosis of Bardet-Biedl syndrome: results of a population survey. *J Med Genet* 36, 437-446.
3. Parisi, M.A. (2009). Clinical and molecular features of Joubert syndrome and related disorders. *Am J Med Genet C Semin Med Genet* 151C, 326-340.
4. Alexiev, B.A., Lin, X., Sun, C.C., and Brenner, D.S. (2006). Meckel-Gruber syndrome: pathologic manifestations, minimal diagnostic criteria, and differential diagnosis. *Arch Pathol Lab Med* 130, 1236-1238.
5. Salomon, R., Saunier, S., and Niaudet, P. (2009). Nephronophthisis. *Pediatr Nephrol* 24, 2333-2344.
6. Thauvin-Robinet, C., Cossee, M., Cormier-Daire, V., Van Maldergem, L., Toutain, A., Alembik, Y., Bieth, E., Layet, V., Parent, P., David, A., et al. (2006). Clinical, molecular, and genotype-phenotype correlation studies from 25 cases of oral-facial-digital syndrome type 1: a French and Belgian collaborative study. *J Med Genet* 43, 54-61.
7. Noone, P.G., Leigh, M.W., Sannuti, A., Minnix, S.L., Carson, J.L., Hazucha, M., Zariwala, M.A., and Knowles, M.R. (2004). Primary ciliary dyskinesia: diagnostic and phenotypic features. *Am J Respir Crit Care Med* 169, 459-467.
8. Gunay-Aygun, M. (2009). Liver and kidney disease in ciliopathies. *Am J Med Genet C Semin Med Genet* 151C, 296-306.
9. Berger, W., Kloeckener-Gruissem, B., and Neidhardt, J. The molecular basis of human retinal and vitreoretinal diseases. *Prog Retin Eye Res*.
10. Cella, W., Lima, L.H., Wang, N.K., Tosi, J., Yannuzzi, L.A., and Tsang, S.H. Autofluorescence and High-Resolution OCT Findings Revealed Ciliopathy in Senior-Loken Syndrome. *Ophthalmic Surg Lasers Imaging*, 1-4.
11. Sillence, D.O. (1980). Non-Majewski short rib-polydactyly syndrome. *Am J Med Genet* 7, 223-229.
12. Spranger, J., and Maroteaux, P. (1990). The lethal osteochondrodysplasias. *Adv Hum Genet* 19, 1-103, 331-102.
